# Supplementary material for: Self-Reported Hidradenitis Suppurativa Severity: Is It Useful for Clinical Practice?
Source: Springer Nature journal article supplement (doi:10.1007/s13555-022-00701-5), 2022-03-10
Supplement: MOESM1 [file 20207782]

## **Self-Reported Hidradenitis Suppurativa Severity: Is It Useful for Clinical Practice?**

**Piotr K Krajewski<sup>1,2</sup>, Servando E Marrón<sup>2,3</sup>, Lucía Tomas Aragones<sup>3,4</sup>, Yolanda Gilaberte-Calzada<sup>2</sup>  
and Jacek C Szepietowski<sup>1</sup>**

<sup>1</sup> Department of Dermatology, Venereology and Allergology, Wrocław Medical University, Chalubinskiego Street 1, Wrocław 50-368, Poland.

<sup>2</sup> Dermatology Department, University Hospital Miguel Servet, Paseo de Isabel la Católica 1-3, 50009 Zaragoza, Spain.

<sup>3</sup> Aragon Psychodermatology Research Group (GAI+PD), Calle San Juan Bosco, 13, 50009 Zaragoza, Spain.

<sup>4</sup> Department of Psychology, University of Zaragoza, Calle Pedro Cerbuna, 12, 50009 Zaragoza, Spain.

### **Address for correspondence:**

Prof. dr. Jacek C Szepietowski

Department of Dermatology, Venereology and Allergology

Wrocław Medical University

Chalubinskiego 1

50-368 Wrocław

e-mail: [jacek.szepietowski@umed.wroc.pl](mailto:jacek.szepietowski@umed.wroc.pl)

Supplementary table 1

Verbal rating scale

|         |          |         |
|---------|----------|---------|
| Grade 1 | Grade 2  | Grade 3 |
| Mild    | Moderate | Severe  |
